# Supplementary material for: Sensor-Independent LAI/FPAR CDR: Reconstructing a Global Sensor-Independent Climate Data Record of MODIS and VIIRS LAI/FPAR from 2000 to 2022
Source: Copernicus journal article supplement (doi:10.5194/essd-2023-356), 2023-09-25
Supplement: Supplementary file 1 [file essd-2023-356-supplement.pdf]

Supplementary.

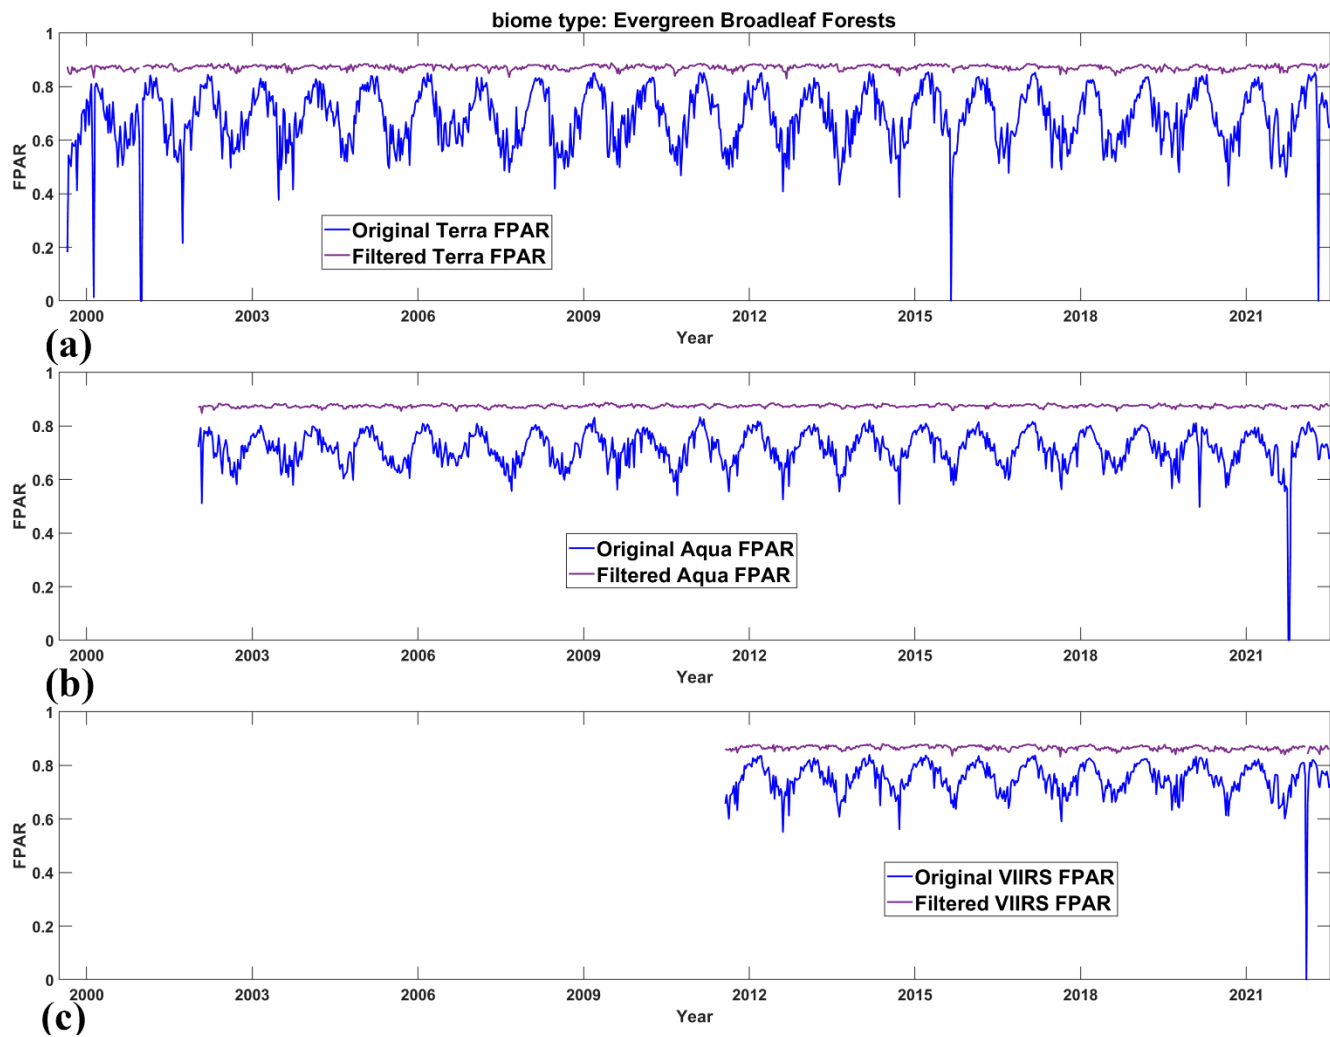

**Figure S1.** Same as Fig. 3 but for FPAR. The temporal comparisons between the original Terra/Aqua/VIIRS FPAR and Filtered Terra/Aqua/VIIRS FPAR for the EBF of Amazon Forest region.

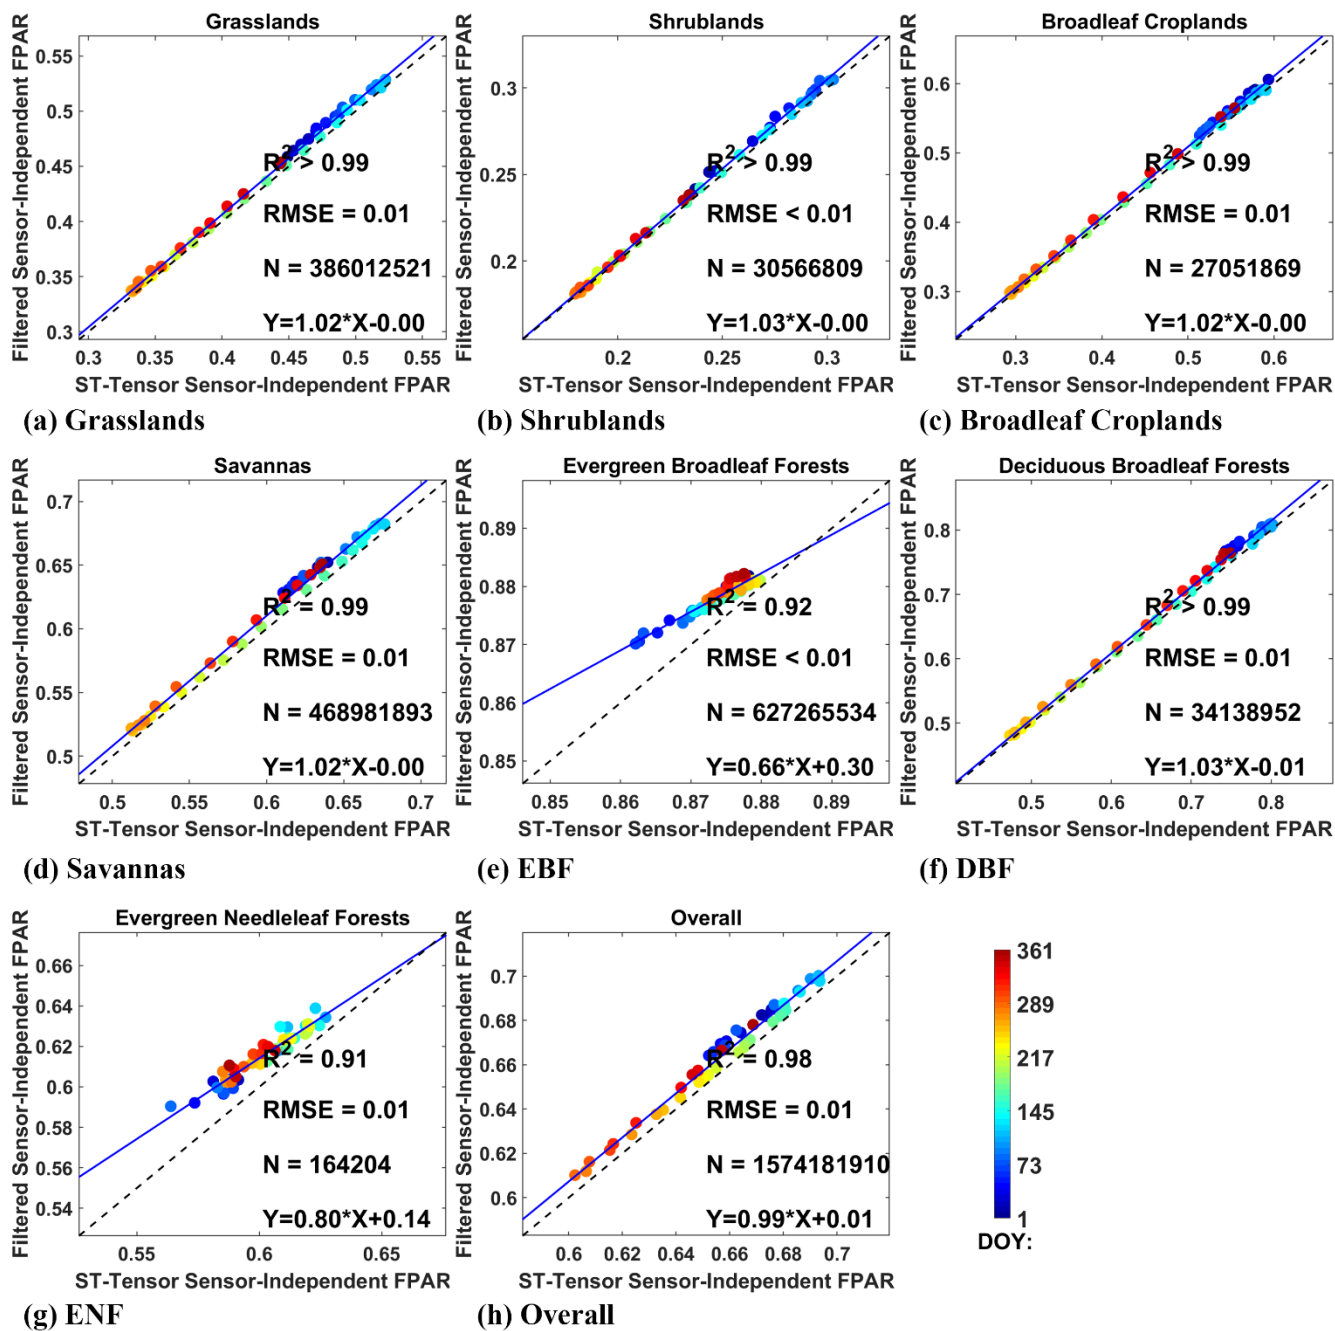

5

**Figure S2.** Same as Fig. 6 but for FPAR. Comparisons of Filtered SI FPAR and ST-Tensor SI PARM 2000 to 2022 year for 5% pixels that Flag=1 in the selected Amazon Forest region (zoom-in case in Fig. 1).

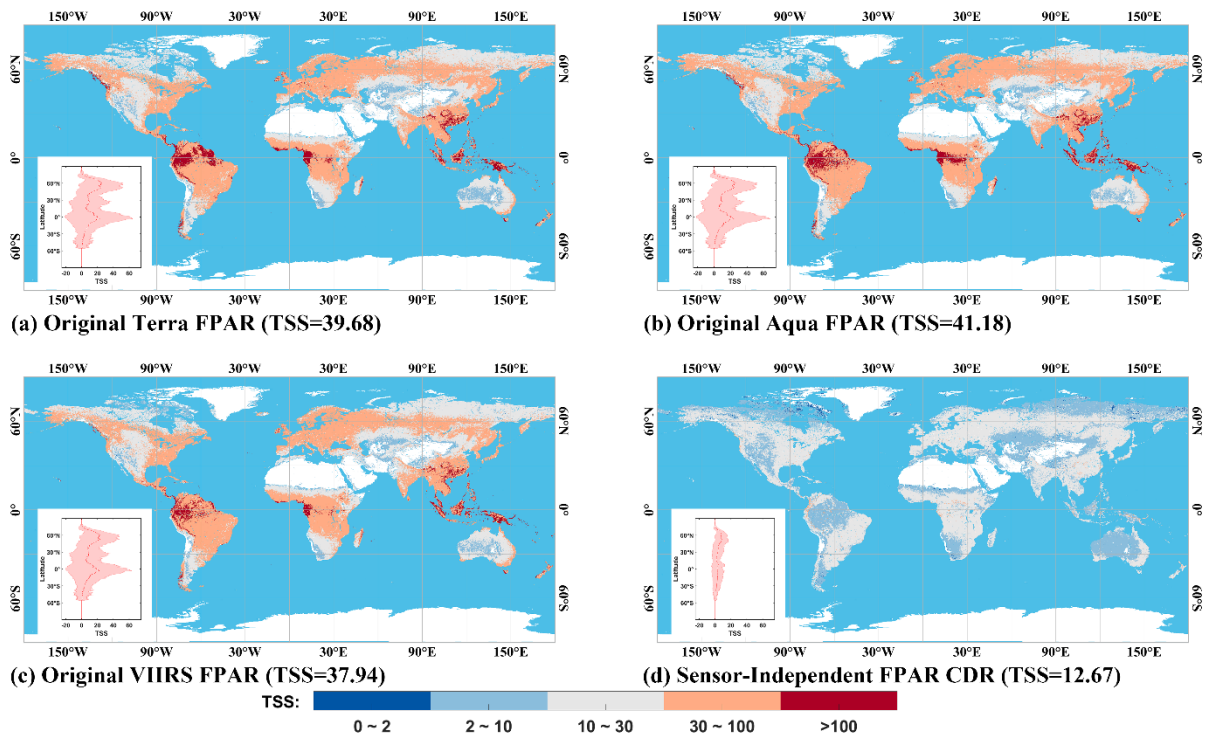

Figure S3. Same as Fig. 7 but for FPAR. The global distribution of FPAR TSS in each 0.05 degree $\times$ 0.05 degree grid from 2013 to 2022.

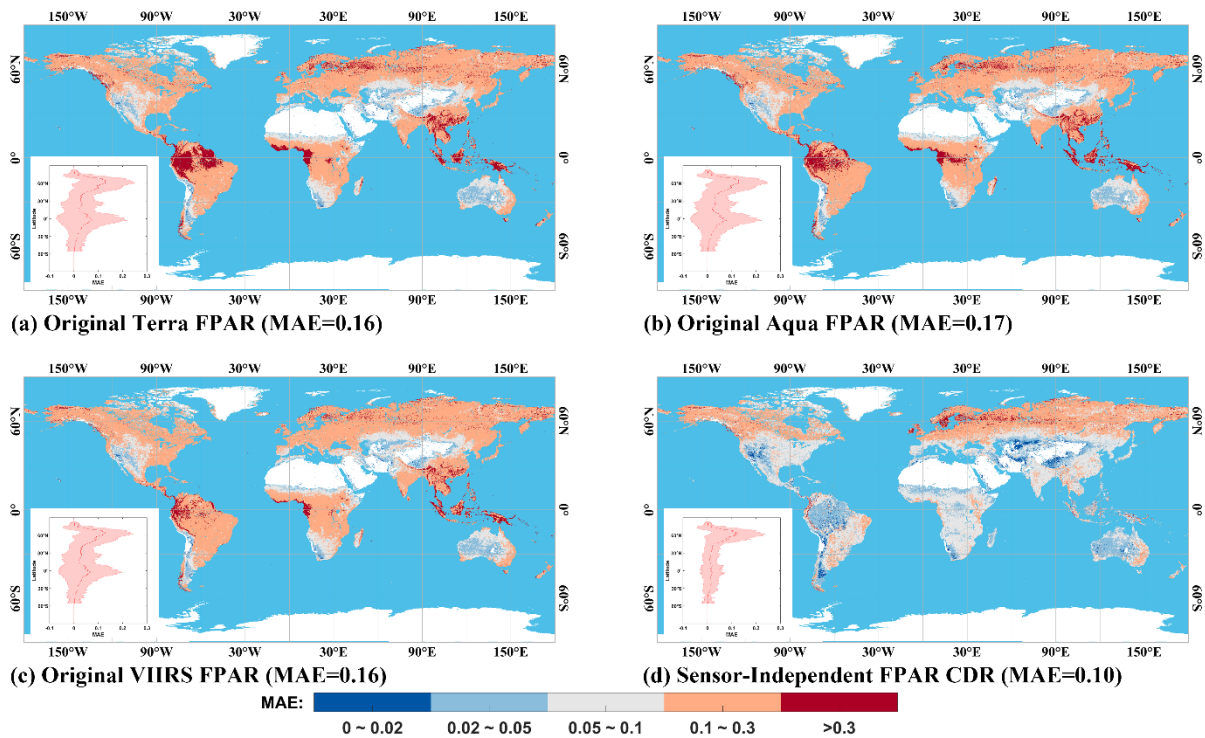

**Figure S4.** Same as Fig. 8 but for FPAR. The global distribution of FPAR MAE in each 0.05 degree $\times$  0.05 degree grid from 2013 to 2022.

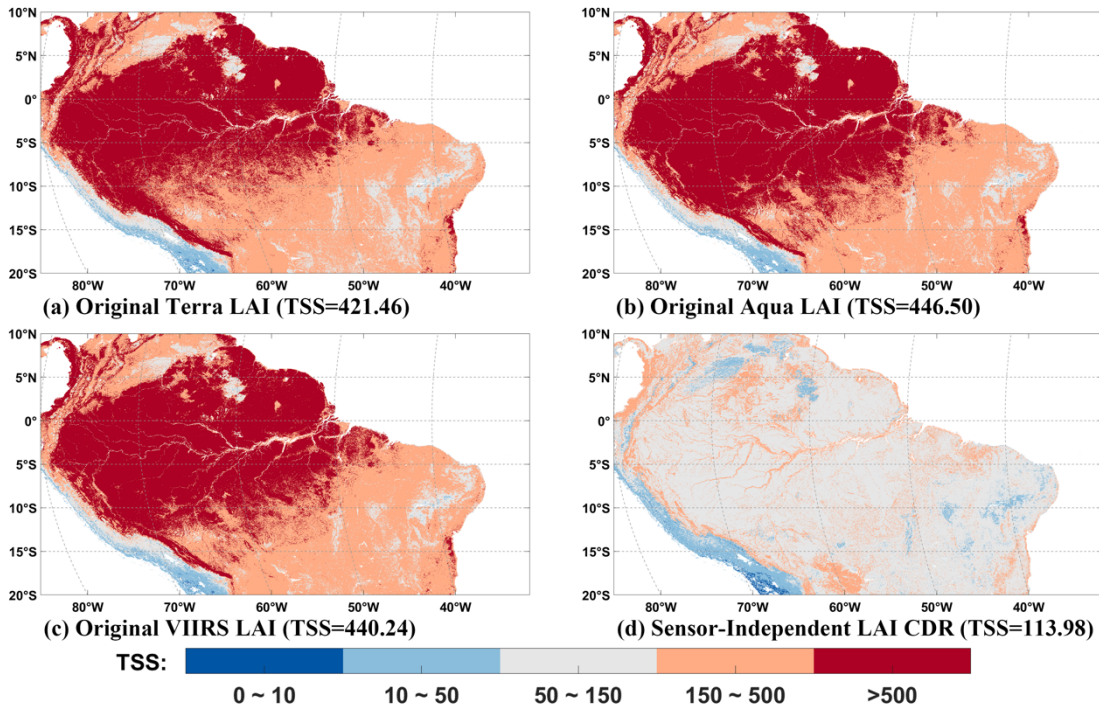

**Figure S5.** Same as Fig. 7 but for the Amazon Forest region. The spatial distribution of LAI TSS in each 500m  $\times$  500m grid, with sinusoidal projection over the selected Amazon Forest region (zoom-in case in Fig. 1), from 2013 to 2022.

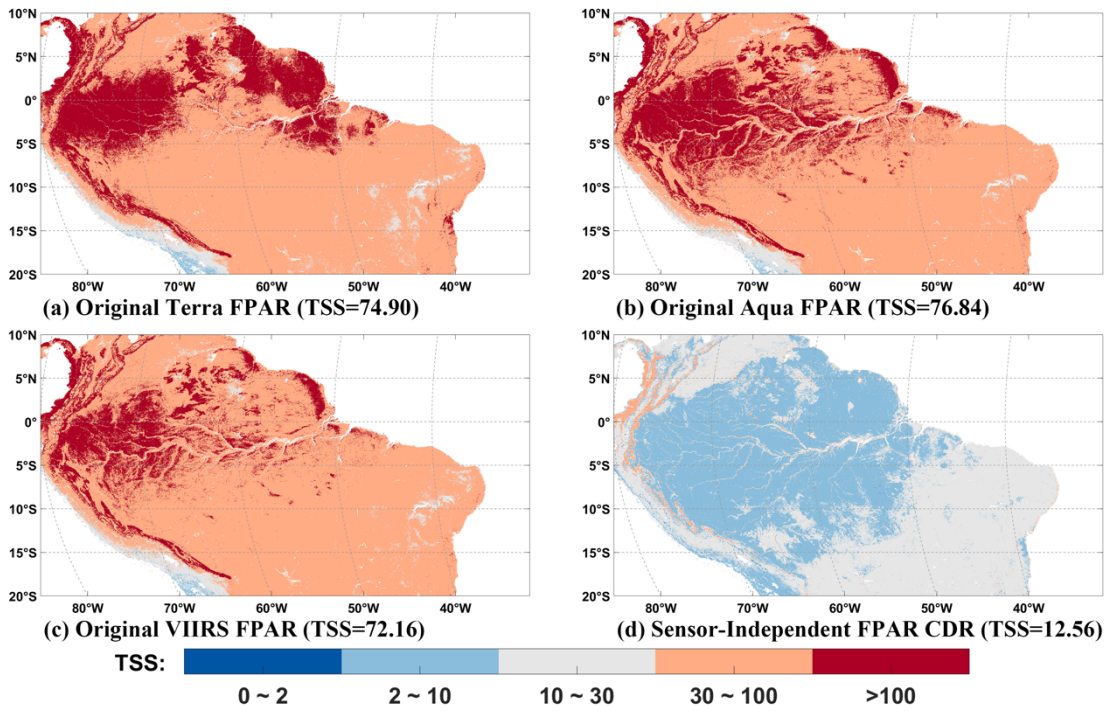

15

**Figure S6.** Same as Fig. S5 but for FPAR. The spatial distribution of FPAR TSS in each 500m x 500m grid, with sinusoidal projection over the selected Amazon Forest region (zoom-in case in Fig. 1), from 2013 to 2022.

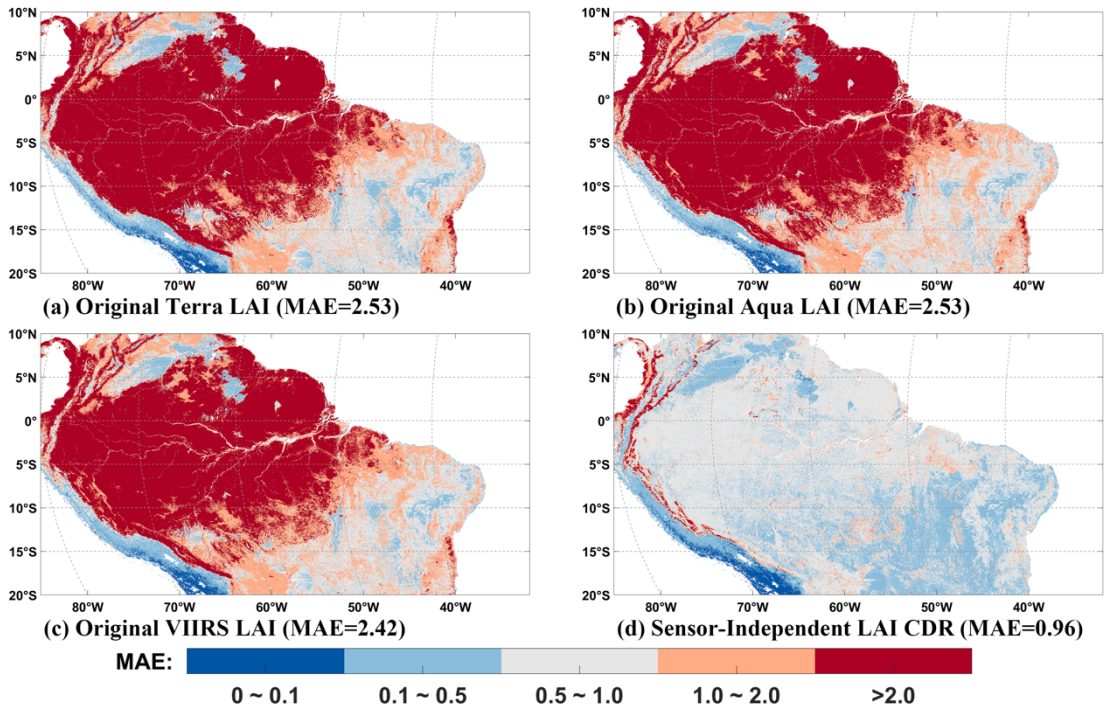

20 **Figure S7.** Same as Fig. S5 but the metric is MAE. The spatial distribution of LAI MAE in each  $500\text{m} \times 500\text{m}$  grid, with sinusoidal projection over the selected Amazon Forest region (zoom-in case in Fig. 1), from 2013 to 2022.

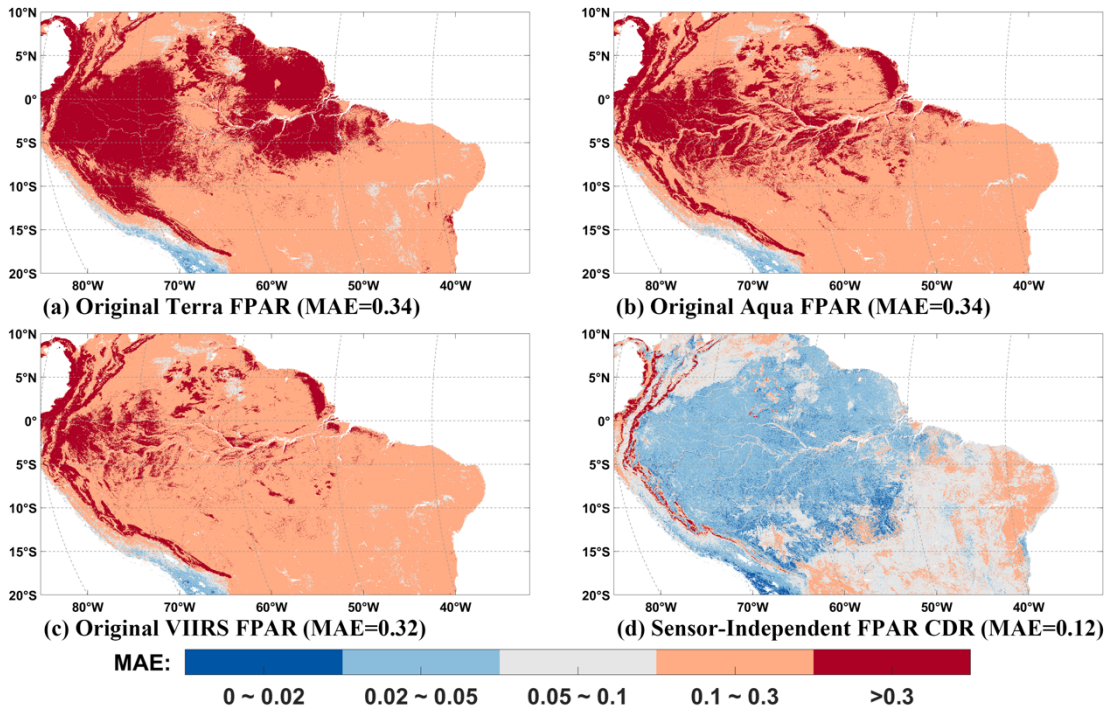

**Figure S8.** Same as Fig. S7 but for FPAR. The spatial distribution of FPAR MAE in each  $500\text{m} \times 500\text{m}$  grid, with sinusoidal projection over the selected Amazon Forest region (zoom-in case in Fig. 1), from 2013 to 2022.

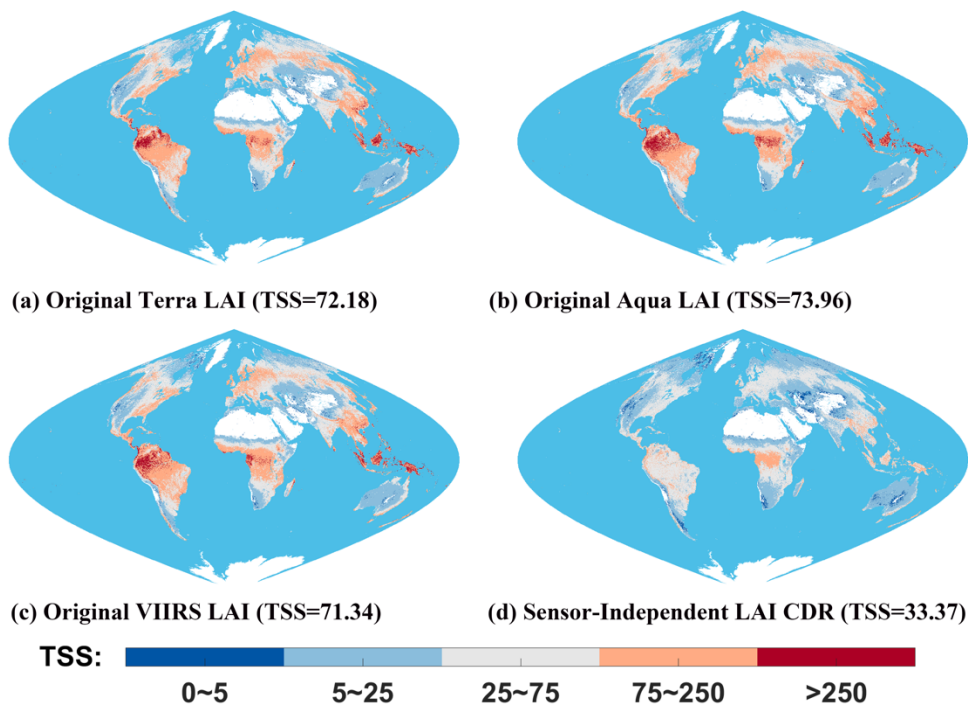

25 **Figure S9.** Same as Fig. S5 and the spatial resolution is 5km and the temporal resolution is bimonthly. The global distribution of LAI TSS in each 5km× 5km grid, with sinusoidal projection, from 2013 to 2022.

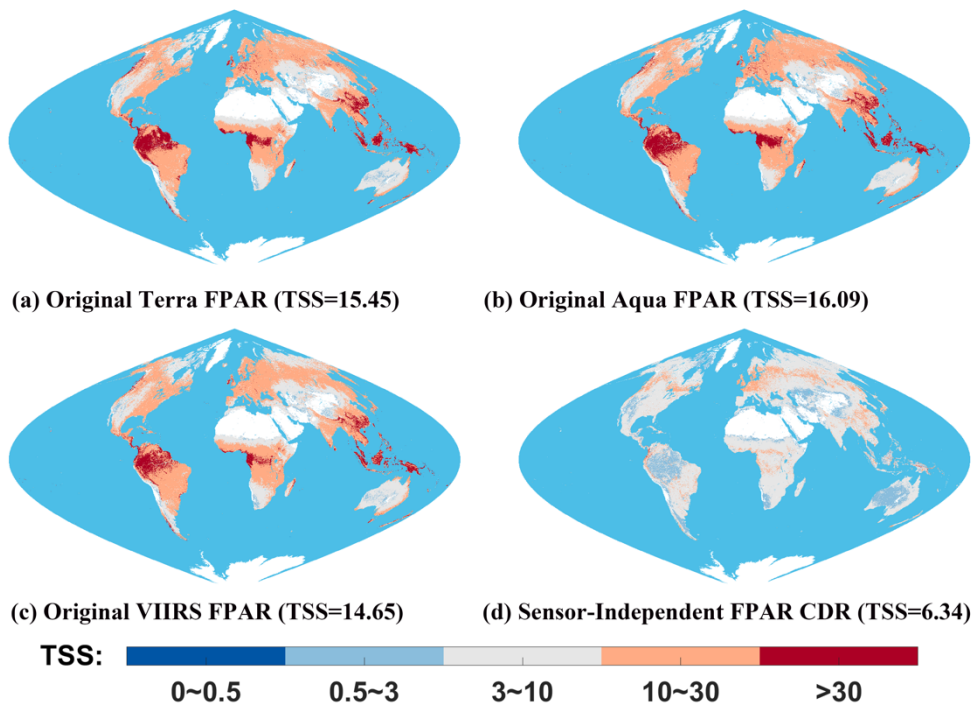

**Figure S10.** Same as Fig. S9 but for FPAR. The global distribution of FPAR TSS in each  $5\text{km} \times 5\text{km}$  grid, with sinusoidal projection, from 2013 to 2022.

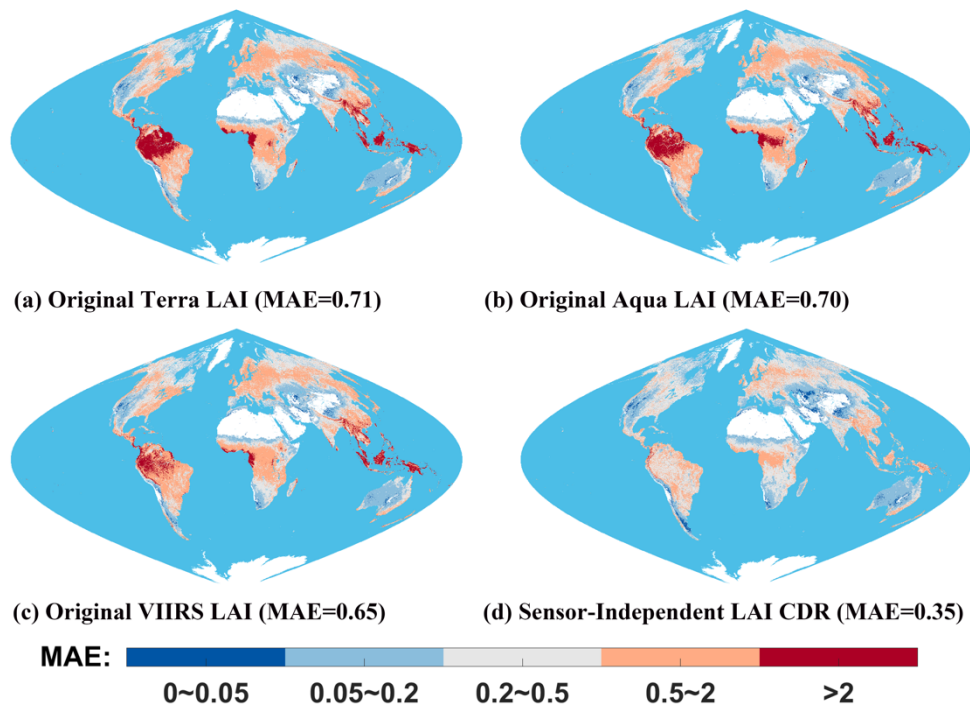

30

**Figure S11.** Same as Fig. S9 but the metric is MAE. The global distribution of LAI MAE in each  $5\text{km} \times 5\text{km}$  grid, with sinusoidal projection, from 2013 to 2022.



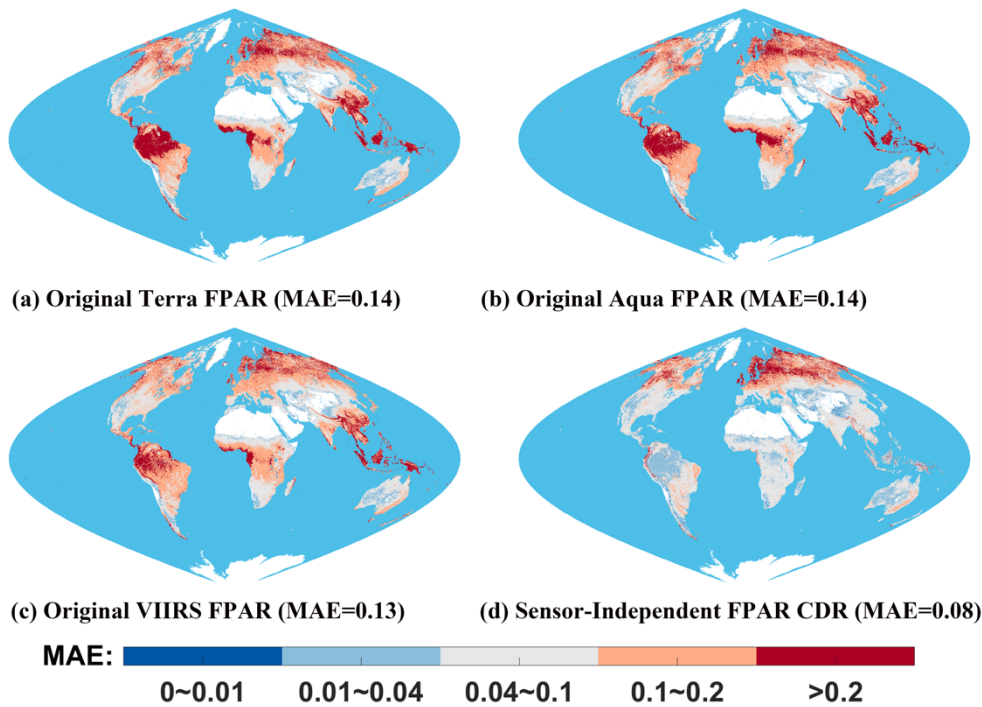

35 **Figure S12.** Same as Fig. S11 but for FPAR. The global distribution of FPAR MAE in each 5km× 5km grid, with sinusoidal projection, from 2013 to 2022.

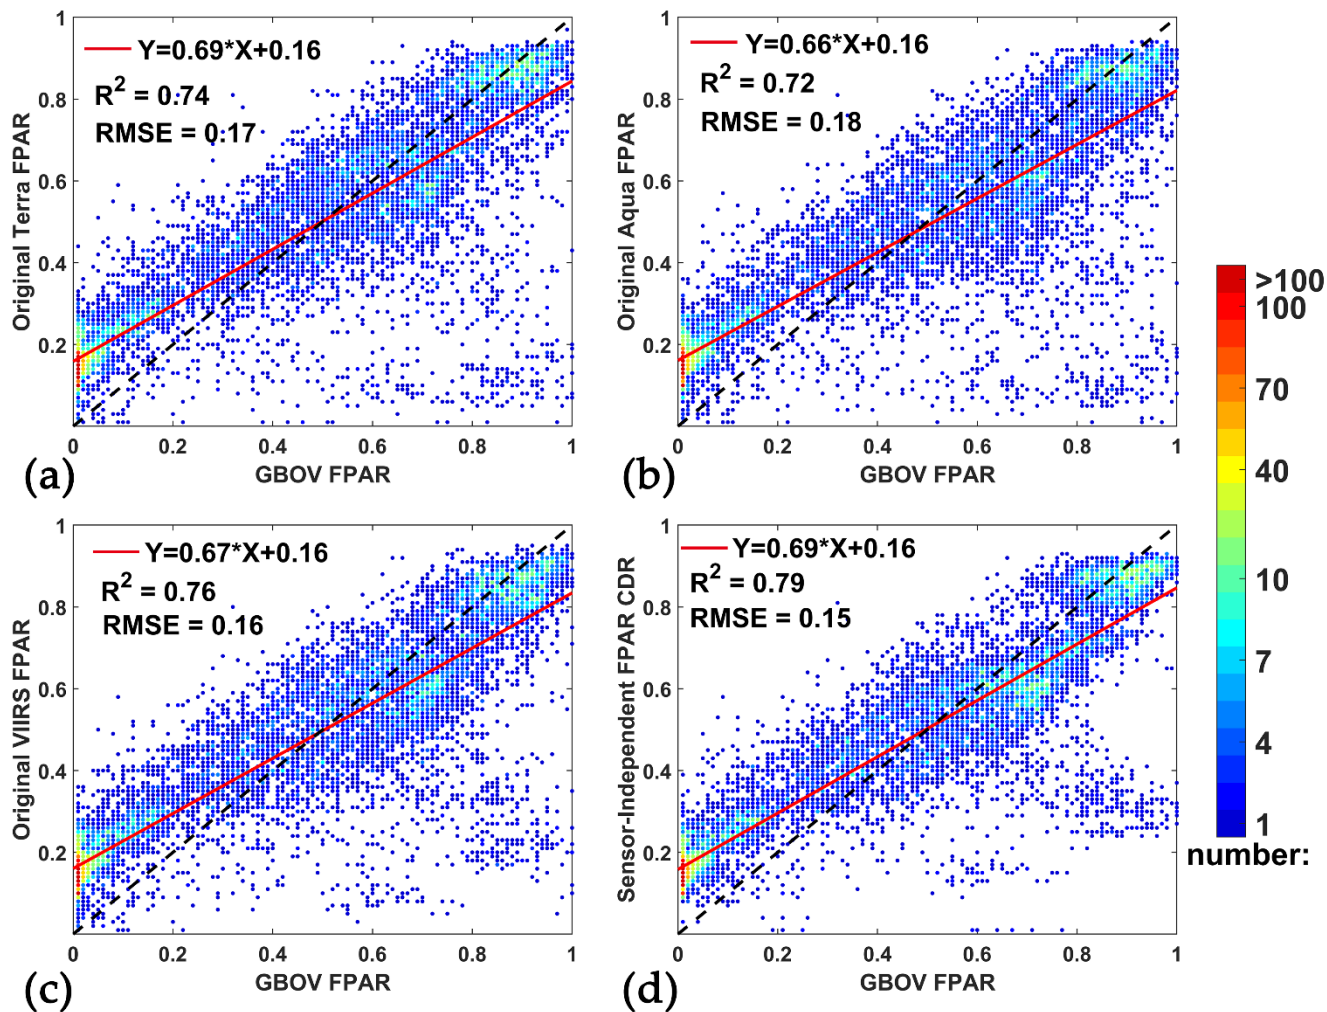

Figure S13. Same as Fig. 9 but for FPAR. Comparisons of original Terra/Aqua/VIIRS FPAR and SI FPAR CDR with ground GBOV FPAR.

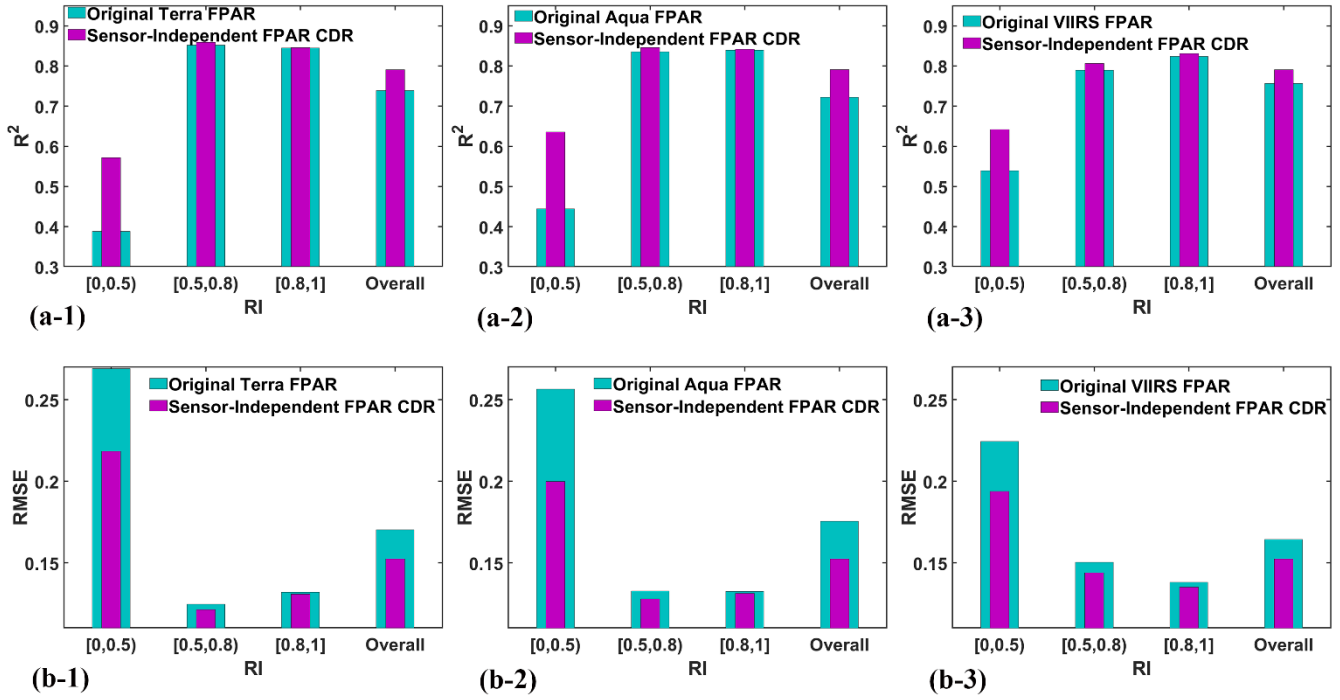

40 **Figure S14.** Same as Fig. 10 but for FPAR. The  $R^2$  and RMSE between original Terra/Aqua/VIIRS FPAR and SI FPAR CDR and GBOV FPAR in different RI ranges.

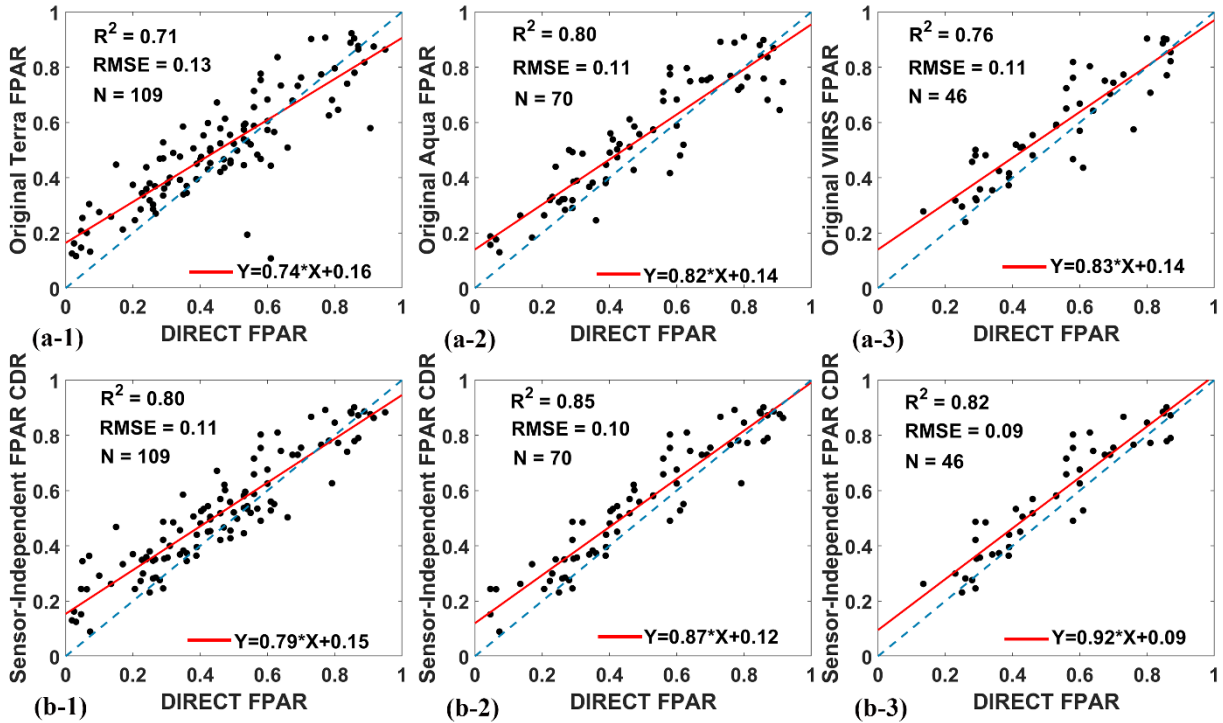

**Figure S15.** Same as Fig. 11 but for FPAR. Comparisons of original Terra/Aqua/VIIRS FPAR and SI FPAR CDR with ground DIRECT2.1 FPAR measurements.
